# Supplementary material for: Craniosacral therapy for chronic pain: a systematic review and meta-analysis of randomized controlled trials
Source: Springer Nature journal article supplement (doi:10.1186/s12891-019-3017-y), 2019-12-31
Supplement: MOESM1 [file 17691832]

## Supplementary material to: Craniosacral Therapy for chronic pain: a systematic review and meta-analysis of randomized controlled trials

By: Heidemarie Haller, Romy Lauche, Tobias Sundberg, Gustav Dobos, and Holger Cramer

Sensitivity analysis including only trails with low risk of selection bias:

| Comparison        | Outcome                  | Time point                                         | Result                                                                       | Change in significance |
|-------------------|--------------------------|----------------------------------------------------|------------------------------------------------------------------------------|------------------------|
| CST versus TAU    | Pain intensity           | Post intervention                                  | 1/2 RCTs, SMD = -0.35, 95%CI = [-0.71, 0.01], N = 123                        | Yes                    |
|                   | Functional disability    | Post intervention                                  | 1/2 RCTs, SMD = -0.64, 95%CI = [-1.01, -0.28], N = 123                       | No                     |
|                   | Physical quality of life | Post intervention                                  | 1/1 RCT, SMD = 0.51, 95%CI = [0.15, 0.87], N = 123                           | No                     |
| CST versus SHAM   | Pain intensity           | Post intervention                                  | 3/4 RCTs, SMD = -0.73, 95%CI = [-1.09, -0.38], I <sup>2</sup> = 10%, N = 146 | No                     |
|                   |                          | 6-month follow-up                                  | 1/2 RCTs, SMD = -0.83, 95%CI = [-1.39, -0.28], N = 54                        | No                     |
|                   | Functional disability    | Post intervention                                  | 3/4 RCTs, SMD = -0.55, 95%CI = [-0.96, -0.13], I <sup>2</sup> = 31%, N = 146 | No                     |
|                   |                          | 6-month follow-up                                  | 1/2 RCTs, SMD = -0.66, 95%CI = [-1.20, -0.11], N = 54                        | No                     |
|                   | Physical quality of life | Post intervention                                  | 1/2 RCTs, SMD = 0.42, 95%CI = [-0.12, 0.96], N = 54                          | Yes                    |
|                   |                          | 6-month follow-up                                  | 1/2 RCTs, SMD = 0.95, 95%CI = [0.38, 1.51], N = 54                           | No                     |
|                   | Mental quality of life   | Post intervention                                  | 1/2 RCTs, SMD = 0.31, 95%CI = [-0.23, 0.85], N = 54                          | Yes                    |
|                   |                          | 6-month follow-up                                  | No significant overall effects.                                              | --                     |
|                   | Global improvement       | Post intervention                                  | 1/2 RCTs, SMD = 1.10, 95%CI = [0.53, 1.68], N = 54                           | No                     |
| 6-month follow-up |                          | 1/2 RCTs, SMD = 0.72, 95%CI = [0.17, 1.27], N = 54 | No                                                                           |                        |
| CST versus AMT    | Pain intensity           | Post intervention                                  | 2/2 RCTs, SMD = -0.53, 95%CI = [-0.89, -0.16], I <sup>2</sup> = 0%, N = 119  | No                     |
|                   | Functional disability    | Post intervention                                  | 2/2 RCTs, SMD = -0.58, 95%CI = [-0.95, -0.21], I <sup>2</sup> = 0%, N = 119  | No                     |

Sensitivity analysis including only trails with low risk of performance bias:

| Comparison        | Outcome                  | Time point                                         | Result                                                                 | Change in significance |
|-------------------|--------------------------|----------------------------------------------------|------------------------------------------------------------------------|------------------------|
| CST versus TAU    | Pain intensity           | Post intervention                                  | The analysis did not contain trails with low risk of performance bias. | --                     |
|                   | Functional disability    | Post intervention                                  | The analysis did not contain trails with low risk of performance bias. | --                     |
|                   | Physical quality of life | Post intervention                                  | The analysis did not contain trails with low risk of performance bias. | --                     |
| CST versus SHAM   | Pain intensity           | Post intervention                                  | 1/4 RCTs, SMD = -1.05, 95%CI = [-1.62, -0.48], N = 54                  | No                     |
|                   |                          | 6-month follow-up                                  | 1/2 RCTs, SMD = -0.83, 95%CI = [-1.39, -0.28], N = 54                  | No                     |
|                   | Functional disability    | Post intervention                                  | 1/4 RCTs, SMD = -0.63, 95%CI = [-1.18, -0.09], N = 54                  | No                     |
|                   |                          | 6-month follow-up                                  | 1/2 RCTs, SMD = -0.66, 95%CI = [-1.20, -0.11], N = 54                  | No                     |
|                   | Physical quality of life | Post intervention                                  | 1/2 RCTs, SMD = 0.42, 95%CI = [-0.12, 0.96], N = 54                    | Yes                    |
|                   |                          | 6-month follow-up                                  | 1/2 RCTs, SMD = 0.95, 95%CI = [0.38, 1.51], N = 54                     | No                     |
|                   | Mental quality of life   | Post intervention                                  | 1/2 RCTs, SMD = 0.31, 95%CI = [-0.23, 0.85], N = 54                    | Yes                    |
|                   |                          | 6-month follow-up                                  | No significant overall effects.                                        | --                     |
|                   | Global improvement       | Post intervention                                  | 1/2 RCTs, SMD = 1.10, 95%CI = [0.53, 1.68], N = 54                     | No                     |
| 6-month follow-up |                          | 1/2 RCTs, SMD = 0.72, 95%CI = [0.17, 1.27], N = 54 | No                                                                     |                        |
| CST versus AMT    | Pain intensity           | Post intervention                                  | The analysis did not contain trails with low risk of performance bias. | --                     |
|                   | Functional disability    | Post intervention                                  | The analysis did not contain trails with low risk of performance bias. | --                     |

Sensitivity analysis including only trials with low risk of detection bias:

| Comparison         | Outcome                  | Time point                                                               | Result                                                                     | Change in significance |
|--------------------|--------------------------|--------------------------------------------------------------------------|----------------------------------------------------------------------------|------------------------|
| CST versus TAU     | Pain intensity           | Post intervention                                                        | The analysis did not contain trails with low risk of detection bias.       | –                      |
|                    | Functional disability    | Post intervention                                                        | The analysis did not contain trails with low risk of detection bias.       | –                      |
|                    | Physical quality of life | Post intervention                                                        | The analysis did not contain trails with low risk of detection bias.       | –                      |
| CST versus SHAM    | Pain intensity           | Post intervention                                                        | 2/4 RCTs, SMD = -0.97, 95%CI = [-1.44, -0.49], I <sup>2</sup> = 0%, N = 77 | No                     |
|                    |                          | 6-month follow-up                                                        | 1/2 RCTs, SMD = -0.83, 95%CI = [-1.39, -0.28], N = 54                      | No                     |
|                    | Functional disability    | Post intervention                                                        | 2/4 RCTs, SMD = -0.76, 95%CI = [-1.22, -0.29], I <sup>2</sup> = 0%, N = 77 | No                     |
|                    |                          | 6-month follow-up                                                        | 1/2 RCTs, SMD = -0.66, 95%CI = [-1.20, -0.11], N = 54                      | No                     |
|                    | Physical quality of life | Post intervention                                                        | 1/2 RCTs, SMD = 0.42, 95%CI = [-0.12, 0.96], N = 54                        | Yes                    |
|                    |                          | 6-month follow-up                                                        | 1/2 RCTs, SMD = 0.95, 95%CI = [0.38, 1.51], N = 54                         | No                     |
|                    | Mental quality of life   | Post intervention                                                        | 1/2 RCTs, SMD = 0.31, 95%CI = [-0.23, 0.85], N = 54                        | Yes                    |
|                    |                          | 6-month follow-up                                                        | No significant overall effects.                                            | –                      |
| Global improvement | Post intervention        | 2/2 RCTs, SMD = 1.29, 95%CI = [0.93, 1.65], I <sup>2</sup> = 0%, N = 146 | No                                                                         |                        |
|                    | 6-month follow-up        | 2/2 RCTs, SMD = 0.51, 95%CI = [0.18, 0.84], I <sup>2</sup> = 0%, N = 146 | No                                                                         |                        |
| CST versus AMT     | Pain intensity           | Post intervention                                                        | 1/2 RCTs, SMD = -0.56, 95%CI = [-1.06, -0.06], N = 64                      | No                     |
|                    | Functional disability    | Post intervention                                                        | 1/2 RCTs, SMD = -0.74, 95%CI = [-1.25, -0.24], N = 64                      | No                     |

Sensitivity analysis including only trials with low risk of attrition bias:

| Comparison         | Outcome                  | Time point                                                               | Result                                                                       | Change in significance |
|--------------------|--------------------------|--------------------------------------------------------------------------|------------------------------------------------------------------------------|------------------------|
| CST versus TAU     | Pain intensity           | Post intervention                                                        | 2/2 RCTs, SMD = -0.32, 95%CI = [-0.61, -0.02], I <sup>2</sup> = 0%, N = 183  | No                     |
|                    | Functional disability    | Post intervention                                                        | 2/2 RCTs, SMD = -0.58, 95%CI = [-0.92, -0.24], I <sup>2</sup> = 0%, N = 143  | No                     |
|                    | Physical quality of life | Post intervention                                                        | 1/1 RCT, SMD = 0.51, 95%CI = [0.15, 0.87], N = 123                           | No                     |
| CST versus SHAM    | Pain intensity           | Post intervention                                                        | 4/4 RCTs, SMD = -0.63, 95%CI = [-0.90, -0.37], I <sup>2</sup> = 0%, N = 230  | No                     |
|                    |                          | 6-month follow-up                                                        | 2/2 RCTs, SMD = -0.59, 95%CI = [-0.99, -0.19], I <sup>2</sup> = 25%, N = 138 | No                     |
|                    | Functional disability    | Post intervention                                                        | 4/4 RCTs, SMD = -0.54, 95%CI = [-0.81, -0.28], I <sup>2</sup> = 0%, N = 230  | No                     |
|                    |                          | 6-month follow-up                                                        | 2/2 RCTs, SMD = -0.53, 95%CI = [-0.87, -0.19], I <sup>2</sup> = 0%, N = 138  | No                     |
|                    | Physical quality of life | Post intervention                                                        | 2/2 RCTs, SMD = 0.59, 95%CI = [0.25, 0.93], I <sup>2</sup> = 0%, N = 138     | No                     |
|                    |                          | 6-month follow-up                                                        | 2/2 RCTs, SMD = 0.62, 95%CI = [0.02, 1.21], I <sup>2</sup> = 64%, N = 138    | No                     |
|                    | Mental quality of life   | Post intervention                                                        | 2/2 RCTs, SMD = 0.35, 95%CI = [0.01, 0.69], I <sup>2</sup> = 0%, N = 138     | No                     |
|                    |                          | 6-month follow-up                                                        | No significant overall effects.                                              | –                      |
| Global improvement | Post intervention        | 2/2 RCTs, SMD = 1.29, 95%CI = [0.93, 1.65], I <sup>2</sup> = 0%, N = 146 | No                                                                           |                        |
|                    | 6-month follow-up        | 2/2 RCTs, SMD = 0.51, 95%CI = [0.18, 0.84], I <sup>2</sup> = 0%, N = 146 | No                                                                           |                        |
| CST versus AMT     | Pain intensity           | Post intervention                                                        | 1/2 RCTs, SMD = -0.56, 95%CI = [-1.06, -0.06], N = 64                        | No                     |
|                    | Functional disability    | Post intervention                                                        | 1/2 RCTs, SMD = -0.74, 95%CI = [-1.25, -0.24], N = 64                        | No                     |

Sensitivity analysis including only trials with low risk of reporting bias:

| Comparison        | Outcome                  | Time point                                         | Result                                                                       | Change in significance |
|-------------------|--------------------------|----------------------------------------------------|------------------------------------------------------------------------------|------------------------|
| CST versus TAU    | Pain intensity           | Post intervention                                  | 1/2 RCTs, SMD = -0.35, 95%CI = [-0.71, 0.01], N = 123                        | Yes                    |
|                   | Functional disability    | Post intervention                                  | 1/2 RCTs, SMD = -0.64, 95%CI = [-1.01, -0.28], N = 123                       | No                     |
|                   | Physical quality of life | Post intervention                                  | 1/1 RCT, SMD = 0.51, 95%CI = [0.15, 0.87], N = 123                           | No                     |
| CST versus SHAM   | Pain intensity           | Post intervention                                  | 2/4 RCTs, SMD = -0.73, 95%CI = [-1.29, -0.18], I <sup>2</sup> = 59%, N = 138 | No                     |
|                   |                          | 6-month follow-up                                  | 1/2 RCTs, SMD = -0.83, 95%CI = [-1.39, -0.28], N = 54                        | No                     |
|                   | Functional disability    | Post intervention                                  | 2/4 RCTs, SMD = -0.61, 95%CI = [-0.96, -0.27], I <sup>2</sup> = 0%, N = 138  | No                     |
|                   |                          | 6-month follow-up                                  | 2/2 RCTs, SMD = -0.53, 95%CI = [-0.87, -0.19], I <sup>2</sup> = 0%, N = 138  | No                     |
|                   | Physical quality of life | Post intervention                                  | 2/2 RCTs, SMD = 0.59, 95%CI = [0.25, 0.93], I <sup>2</sup> = 0%, N = 138     | No                     |
|                   |                          | 6-month follow-up                                  | 2/2 RCTs, SMD = 0.62, 95%CI = [0.02, 1.21], I <sup>2</sup> = 64%, N = 138    | No                     |
|                   | Mental quality of life   | Post intervention                                  | 2/2 RCTs, SMD = 0.35, 95%CI = [0.01, 0.69], I <sup>2</sup> = 0%, N = 138     | No                     |
|                   |                          | 6-month follow-up                                  | No significant overall effects.                                              | –                      |
|                   | Global improvement       | Post intervention                                  | 1/2 RCTs, SMD = 1.10, 95%CI = [0.53, 1.68], N = 54                           | No                     |
| 6-month follow-up |                          | 1/2 RCTs, SMD = 0.72, 95%CI = [0.17, 1.27], N = 54 | No                                                                           |                        |
| CST versus AMT    | Pain intensity           | Post intervention                                  | 1/2 RCTs, SMD = -0.56, 95%CI = [-1.06, -0.06], N = 64                        | No                     |
|                   | Functional disability    | Post intervention                                  | 1/2 RCTs, SMD = -0.74, 95%CI = [-1.25, -0.24], N = 64                        | No                     |

Sensitivity analysis including only trials with low risk of other bias:

| Comparison        | Outcome                  | Time point                                         | Result                                                           | Change in significance |
|-------------------|--------------------------|----------------------------------------------------|------------------------------------------------------------------|------------------------|
| CST versus TAU    | Pain intensity           | Post intervention                                  | The analysis did not contain trials with low risk of other bias. | –                      |
|                   | Functional disability    | Post intervention                                  | The analysis did not contain trials with low risk of other bias. | –                      |
|                   | Physical quality of life | Post intervention                                  | The analysis did not contain trials with low risk of other bias. | –                      |
| CST versus SHAM   | Pain intensity           | Post intervention                                  | 1/4 RCTs, SMD = -1.05, 95%CI = [-1.62, -0.48], N = 54            | No                     |
|                   |                          | 6-month follow-up                                  | 1/2 RCTs, SMD = -0.83, 95%CI = [-1.39, -0.28], N = 54            | No                     |
|                   | Functional disability    | Post intervention                                  | 1/4 RCTs, SMD = -0.63, 95%CI = [-1.18, -0.09], N = 54            | No                     |
|                   |                          | 6-month follow-up                                  | 1/2 RCTs, SMD = -0.66, 95%CI = [-1.20, -0.11], N = 54            | No                     |
|                   | Physical quality of life | Post intervention                                  | 1/2 RCTs, SMD = 0.42, 95%CI = [-0.12, 0.96], N = 54              | Yes                    |
|                   |                          | 6-month follow-up                                  | 1/2 RCTs, SMD = 0.95, 95%CI = [0.38, 1.51], N = 54               | No                     |
|                   | Mental quality of life   | Post intervention                                  | 1/2 RCTs, SMD = 0.31, 95%CI = [-0.23, 0.85], N = 54              | Yes                    |
|                   |                          | 6-month follow-up                                  | No significant overall effects.                                  | –                      |
|                   | Global improvement       | Post intervention                                  | 1/2 RCTs, SMD = 1.10, 95%CI = [0.53, 1.68], N = 54               | No                     |
| 6-month follow-up |                          | 1/2 RCTs, SMD = 0.72, 95%CI = [0.17, 1.27], N = 54 | No                                                               |                        |
| CST versus AMT    | Pain intensity           | Post intervention                                  | The analysis did not contain trials with low risk of other bias. | –                      |
|                   | Functional disability    | Post intervention                                  | The analysis did not contain trials with low risk of other bias. | –                      |
